# Supplementary material for: A novel two-step Fe–Au type spin-crossover behavior in a Hofmann-type coordination complex {Fe(4-methylpyrimidine)2[Au(CN)2]2}
Source: Royal Society of Chemistry journal article supplement (doi:10.1039/d0dt01681k), 2020-01-01
Supplement: d0dt01681k1.pdf [file d0dt01681k1.pdf]

## Supporting Information

### Novel two-step Fe-Au type spin-crossover behavior in a Hofmann- like complex $\text{Fe}(\text{4-methylpyrimidine})_2[\text{Au}(\text{CN})_2]_2$

Kosuke Kitase<sup>†</sup>, Takafumi Kitazawa<sup>†, ‡, \*</sup>

<sup>†</sup> Department of Chemistry, Toho University, Chiba 274-8510, Japan.

<sup>‡</sup> Research Centre for Materials with Integrated Properties, Toho University, Chiba 274-8510, Japan.

\*Correspondence: [kitazawa@chem.sci.toho-u.ac.jp](mailto:kitazawa@chem.sci.toho-u.ac.jp); Tel.: +81-047-472-5077

$\chi_M$  vs  $T$  plot

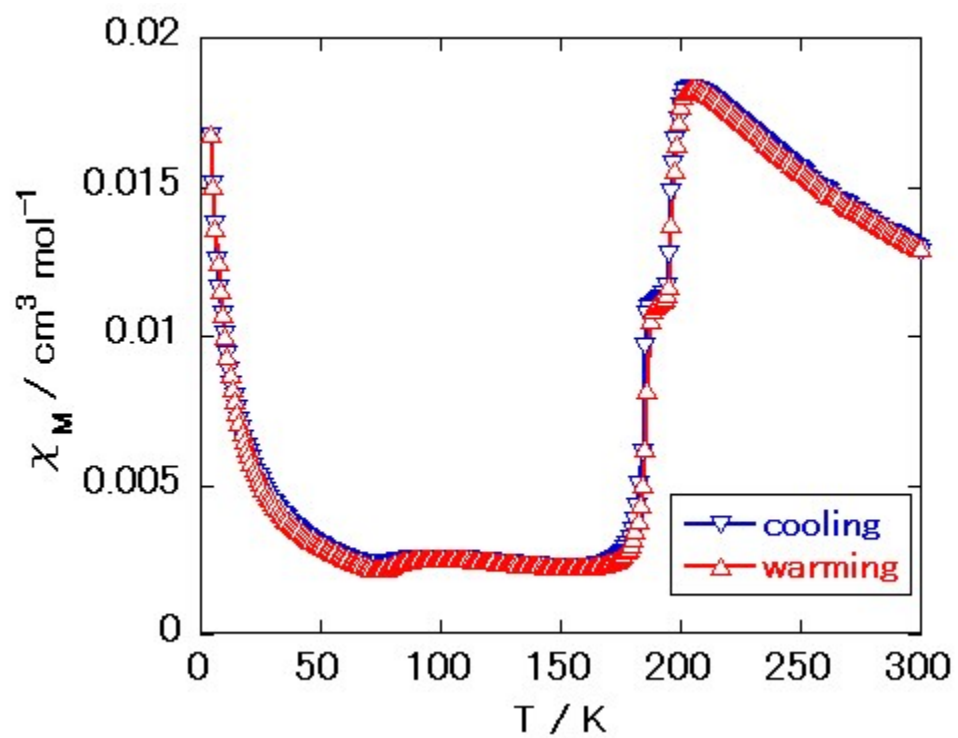

Figure S1.  $\chi_M$  vs  $T$  plot of **1**

## Additional crystallographic data

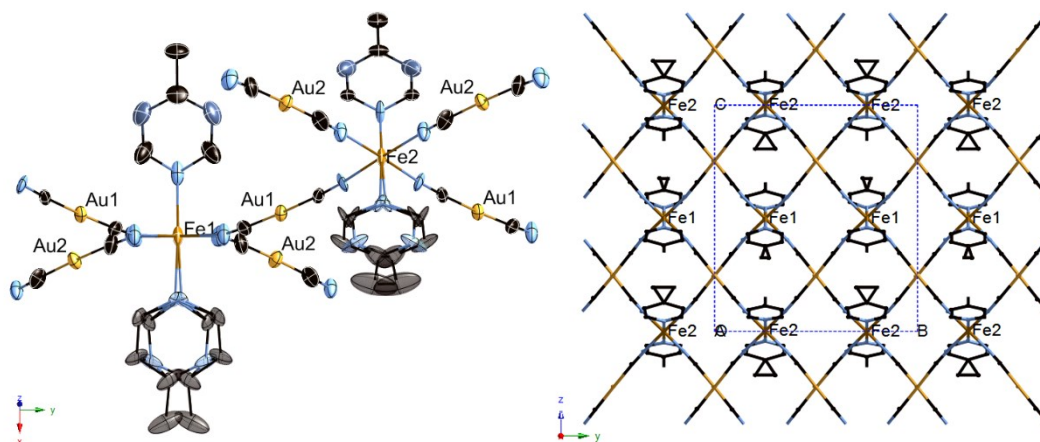

Figure S2. Crystal structure of complex **1** as determined by XRD at 190 K. (Black: C, aqua: N, brown: Fe, yellow: Au, and indigo: disordered between C and N by two orientations.) Left: ORTEP structure. Right: Packing structure along the [001] direction.

Table S1. The crystallographic parameters of **1**

|                                                  |                                                                   |                                  |                                  |
|--------------------------------------------------|-------------------------------------------------------------------|----------------------------------|----------------------------------|
| Empirical formula                                | C <sub>14</sub> H <sub>12</sub> Au <sub>2</sub> Fe N <sub>8</sub> |                                  |                                  |
| Formula weight                                   | 742.1                                                             |                                  |                                  |
| Crystal size                                     | 0.38 x 0.25 x 0.12 mm <sup>3</sup>                                |                                  |                                  |
| Temperature / K                                  | 298(2)                                                            | 190(2)                           | 150(2)                           |
| Crystal system                                   | Orthorhombic                                                      | Monoclinic                       | Orthorhombic                     |
| a / Å                                            | 9.5856(7)                                                         | 9.554(4)                         | 9.5273(9)                        |
| b / Å                                            | 15.5741(11)                                                       | 13.698(6)                        | 14.8094(15)                      |
| c / Å                                            | 13.7797(10)                                                       | 15.262(7)                        | 13.5467(13)                      |
| β / deg.                                         | 90                                                                | 90.387(7)                        | 90                               |
| V / Å <sup>3</sup>                               | 2057.1(3)                                                         | 1997.4(14)                       | 1911.4(3)                        |
| Space group                                      | <i>Pbcm</i>                                                       | <i>P2<sub>1</sub>/m</i>          | <i>Pbcm</i>                      |
| Z                                                | 4                                                                 | 4                                | 4                                |
| D <sub>calc</sub>                                | 2.396                                                             | 2.468                            | 2.579                            |
| F(000)                                           | 1344                                                              | 1344                             | 1344                             |
| Reflections collected                            | 15279                                                             | 14676                            | 14002                            |
| Independent reflections                          | 3307 [R <sub>int</sub> = 0.0368]                                  | 6186 [R <sub>int</sub> = 0.0894] | 3082 [R <sub>int</sub> = 0.0407] |
| Data/ restraints / parameters                    | 3307 / 6 / 141                                                    | 6186 / 68 / 254                  | 3082 / 42 / 142                  |
| Final R <sub>1</sub> , R <sub>w</sub> (I > 2s)   | 0.0295, 0.0660                                                    | 0.0802, 0.1853                   | 0.0231, 0.0507                   |
| Final R <sub>1</sub> , R <sub>w</sub> (all data) | 0.0550, 0.0749                                                    | 0.1673, 0.2247                   | 0.0410, 0.0567                   |
| Goodness-of-fit on F <sup>2</sup>                | 1.050                                                             | 1.114                            | 1.065                            |

Table S2. The reconstructed reciprocal lattice of **1**

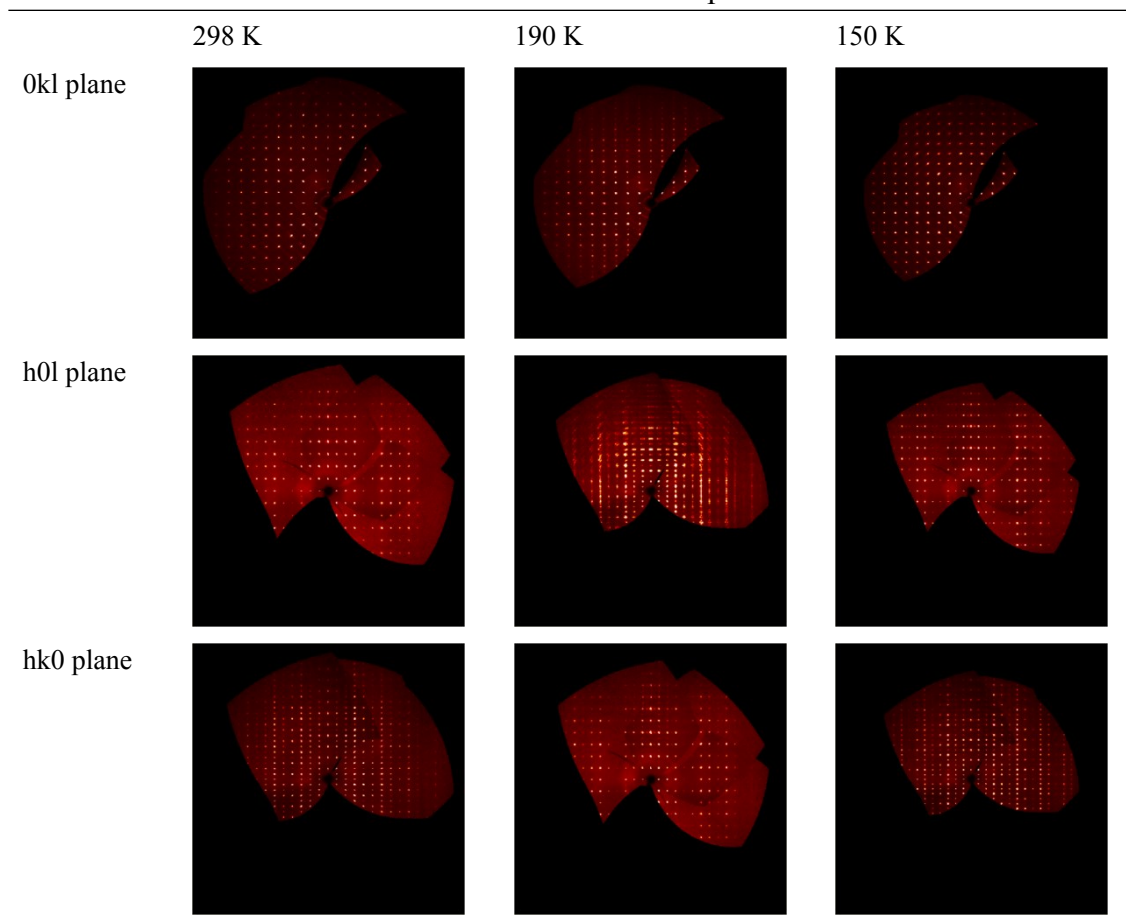

## Powder X-ray Pattern

Powder X-ray diffraction measurement of complex **1** is measured by Rigaku X-RAY DIFFRACTOMETER. The spectrum shows in Figure S2.

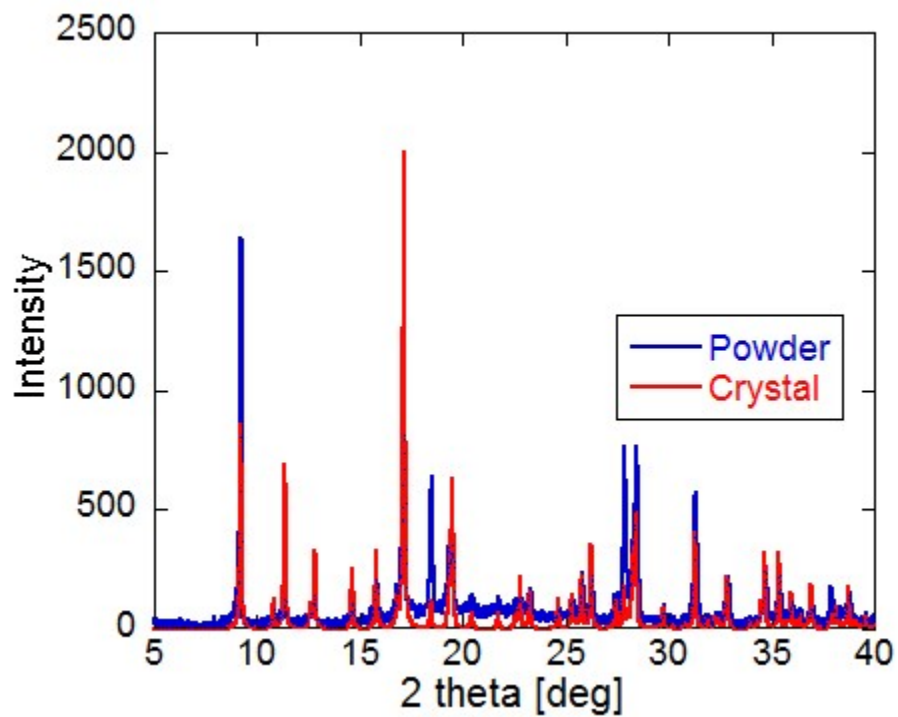

Figure S3. Powder X-ray diffraction measurement of **1** (blue: observed, red: calculated).

## TG analysis

Thermal gravimetry of complex **1** is measured by Hitachi High-Technologies Corporation TG/DTA6200. The result shows in Figure S3.

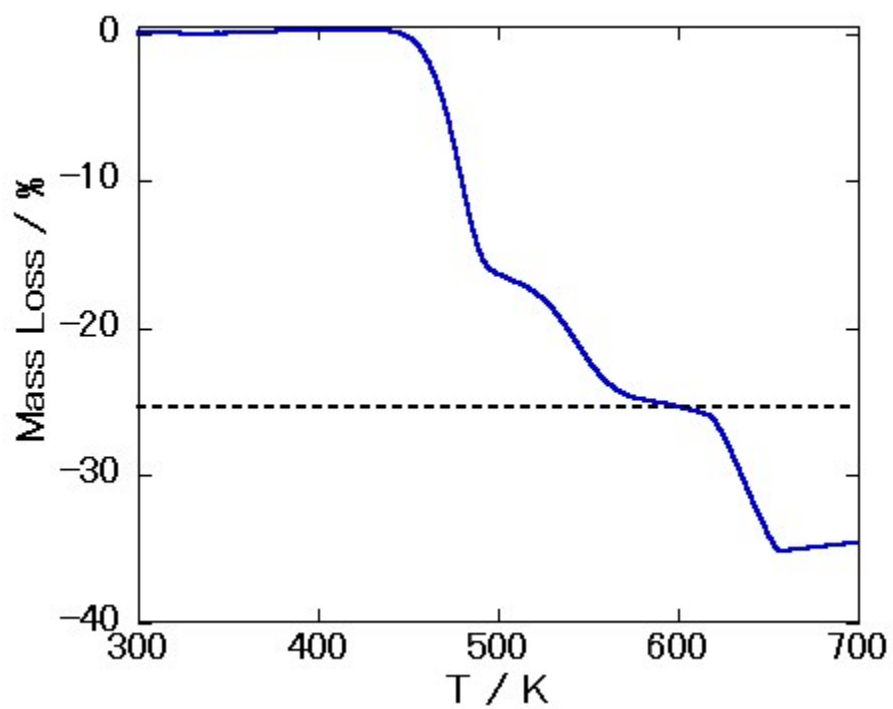

Figure S4. TG analysis of 1.

## DSC analysis

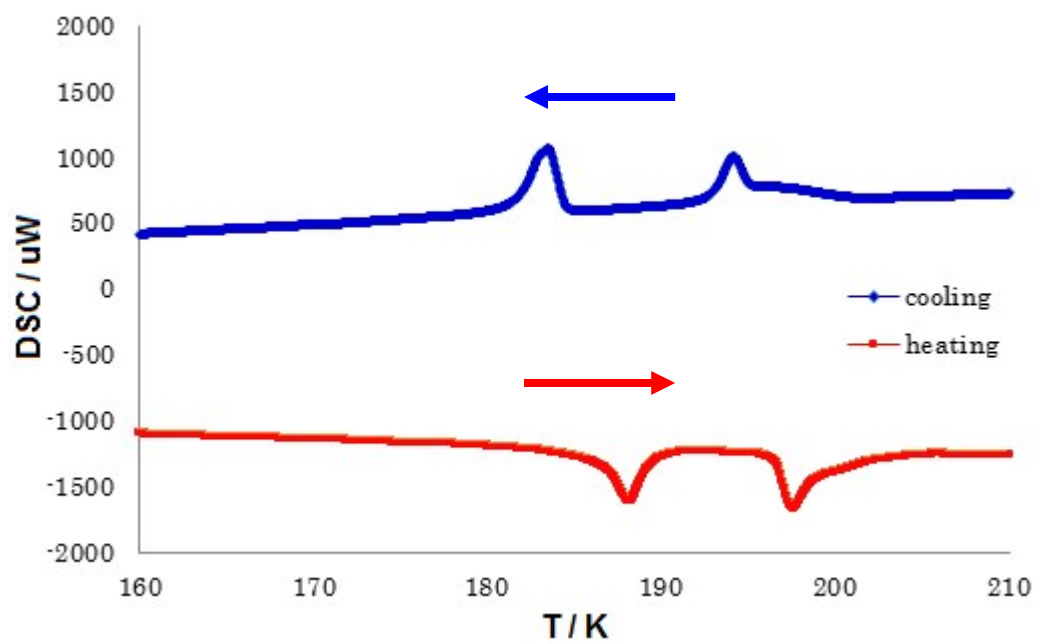

Figure S5. DSC analysis of 1.
